# Supplementary material for: Topical Delivery of Atraric Acid Derived from Stereocaulon japonicum with Enhanced Skin Permeation and Hair Regrowth Activity for Androgenic Alopecia
Source: MDPI journal article supplement (doi:10.3390/pharmaceutics15020340), 2023-01-19
Supplement: s1 [file s1]

**(a)**

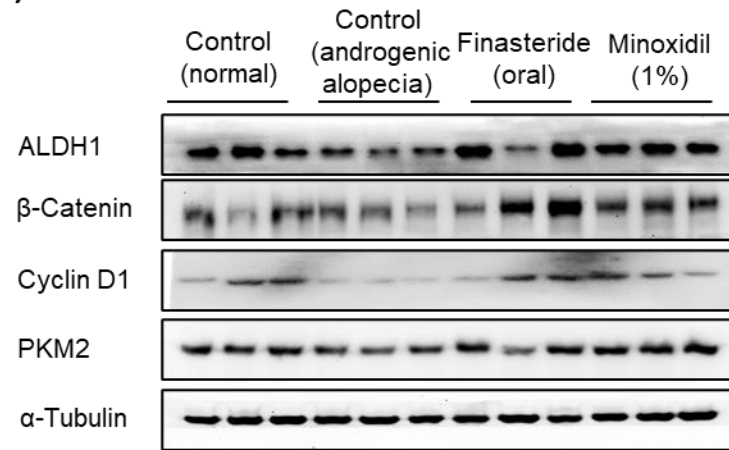

**(b)**

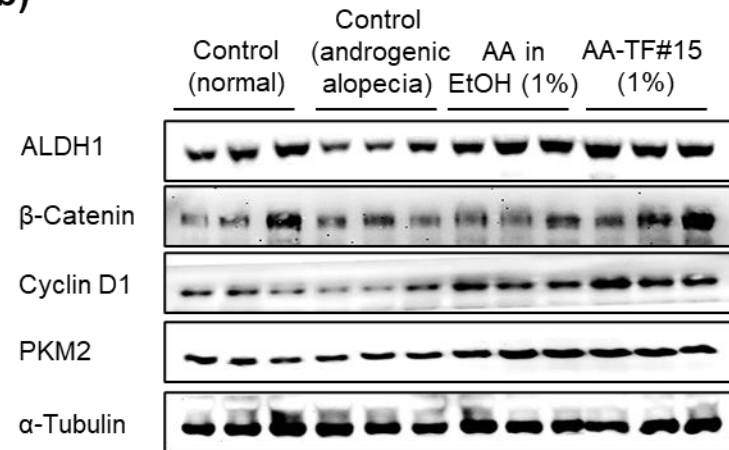

**Figure S1.** Expression of ALDH-1,  $\beta$ -catenin, cyclin D1, and PKM2 proteins in the dorsal skin of mice measured by western blotting. **(a, b)** Western blot analyses of ALDH-1,  $\beta$ -catenin, cyclin D1, and PKM2 proteins. Actin and  $\alpha$ -tubulin are loading controls.
